# Supplementary material for: Group 4 salicyloxazolines are potent polymerization catalysts
Source: Royal Society of Chemistry journal article supplement (doi:10.1039/b509807f), 2005-01-01
Supplement: b509807f.pdf [file b509807f.pdf]

## Group 4 Salicyloxazolines are Potent Polymerisation Catalysts

Robyn K. J. Bott,<sup>a</sup> Max Hammond,<sup>b</sup> Peter N. Horton,<sup>c¶</sup> Simon J. Lancaster,<sup>a</sup> Manfred Bochmann,<sup>a\*</sup> and Peter Scott<sup>b\*</sup>

### SUPPORTING INFORMATION

#### Contents

*Details of preparative procedures*

*Reactions of  $L^6ZrCl_2$  with MAO/ $Me_3Al$*

*Tables of crystallographic and refinement data for  $L^2ZrCl_2$  and  $L^4ZrCl_2$ .*

#### 2-Methyl-6-(3,3-dimethyloxazoliny)phenol, HL<sup>2</sup>

2-Hydroxy-3-methylbenzoic acid (15.2 g, 0.1 mol) and 1,1'-carbonyldiimidazole (17.6 g, 0.11 mol) in dry tetrahydrofuran (200 mL) were heated at reflux for 1 h, before the addition of 2-amino-2-methyl-propan-1-ol (13.4 g, 0.15 mol) and heating at reflux for a further 18 h. The yellow/ orange oily intermediate (6.9 g, 30.9 mmol) was purified by column chromatography (eluent diethyl ether/ light petroleum 1:4), dissolved into dry dichloromethane at 0 °C and treated dropwise with thionyl chloride (7.35 g, 61.8 mmol, 4.5 mL). The solution was allowed to warm slowly to room temperature and was then stirred for 18 h. The resulting HCl salt was filtered off, treated with saturated aqueous sodium hydrogen carbonate until basic, and extracted with diethyl ether (3 x 200 mL). The yellow solution was dried over  $MgSO_4$ , and concentrated to give the title compound as a pale yellow/ peach oil (5.17 g, 25.2 mmol, 25.2 %).

<sup>1</sup>H NMR (300 MHz, 298 K,  $C_6D_6$ )  $\delta$  12.8 (br, 1 H, OH), 7.54 (dd, 1 H, J = 7.8, 1.6 Hz, Ar-H), 7.26 (dd, 1 H, J = 7.3, 1.6 Hz, Ar-H), 6.81 (t, 1 H, J = 7.6 Hz, Ar-H), 4.12 (s, 2 H,  $CH_2$ ), 2.34 (s, 3 H, Ar- $CH_3$ ), 1.42(s, 6 H,  $CH_3$ ).

$^{13}\text{C}\{^1\text{H}\}$  NMR (75.6 MHz, 298 K,  $\text{C}_6\text{D}_6$ )  $\delta$  163.8 (O-C=N), 158.1 (Ar-C), 133.9 (Ar-CH), 125.6 (Ar-C), 125.3 (Ar-CH), 117.9 (Ar-CH), 110.0 (Ar-C), 78.2 ( $\text{C}(\text{CH}_3)_2$ ), 28.4 ( $\text{C}(\text{CH}_3)_2$ ), 15.8 (Ar- $\text{CH}_3$ ).

EA. Found (calcd. for  $\text{C}_{12}\text{H}_{15}\text{NO}_2$ ): C: 69.84 (70.22), H: 7.15 (7.37), N: 6.61 (6.82).

MS:  $\text{M}^+ = 178$ .

### **2-(4,4-dimethyl-4,5-dihydrooxazol-2-yl)-4,6-diisopropylphenol, HL<sup>3</sup>**

To 3,5-di-isopropylsalicylic acid (2.45 g, 11 mmol) in a Schlenk vessel was added  $\text{PPh}_3$  (11.5 g, 44 mmol), and the atmosphere in the vessel replaced with argon. Acetonitrile (~25 ml), and then triethylamine (6 ml, 43 mmol) were added, with stirring. 2-amino-2-methyl-1-propanol (0.98 g, 11 mmol) was injected in a small volume of acetonitrile.  $\text{CCl}_4$  (10.6 ml, 110 mmol) was added dropwise over 4 hours. The mixture was stirred for 48 hours, after which time the solution was filtered under suction. The residue was washed with  $\text{Et}_2\text{O}$  (*ca.* 30 ml) which caused a further precipitation in the filtrate. This precipitate was removed by filtration. The solvents were removed in *vacuo*, and the product extracted with hexane (3 x 100 ml). The combined extracts were dried *in vacuo*, and the pale yellow powder was purified by flash chromatography on a silica column, eluted with hexane-ethyl acetate (50:1), affording HL<sup>3</sup> as a pale yellow crystalline solid (1.01 g, 33%) after removal of solvent.

$^1\text{H}$  NMR ( $\text{CDCl}_3$ ):  $\delta$  ppm 12.25 (s, 1H, OH), 7.27 (d,  $^4J_{\text{HH}} = 2$  Hz, 1H, ArH), 7.09 (d,  $^4J_{\text{HH}} = 2$  Hz, 1H, ArH), 4.00 (s, 2H,  $\text{CH}_2$ ), 3.30 (sept.,  $^3J_{\text{HH}} = 7$  Hz, 1H,  $\text{CH}(\text{CH}_3)_2$ ), 2.77 (sept.,  $^3J_{\text{HH}} = 7$  Hz, 1H,  $\text{CH}(\text{CH}_3)_2$ ), 1.30 (s, 6H,  $\text{CH}_3$ ), 1.18 (d, 6H,  $^3J_{\text{HH}} = 7$  Hz,  $\text{CH}(\text{CH}_3)_2$ ), 1.15 (d, 6H,  $^3J_{\text{HH}} = 7$  Hz,  $\text{CH}(\text{CH}_3)_2$ ).

$^{13}\text{C}\{^1\text{H}\}$  NMR ( $\text{CDCl}_3$ ):  $\delta$  ppm 164.1 (N=C-O); 155.5, 138.5, 135.7 (Ar), 128.5, 122.3 (Ar C-H), 109.9 (Ar), 78.3 ( $\text{C}(\text{CH}_3)_2$ ), 67.0 ( $\text{CH}_2$ ), 33.6 ( $\text{CH}(\text{CH}_3)_2$ ), 28.6 ( $\text{CH}_3$ ), 27.1 ( $\text{CH}(\text{CH}_3)_2$ ), 24.2, 22.5 ( $\text{CH}(\text{CH}_3)_2$ ).

EA: found (calc) C: 74.01 (74.14), H: 9.15 (9.15), N: 5.03 (5.09)

MS (EI):  $m/z$  275 ( $\text{M}^+$ ), 260 ( $[\text{M} - \text{CH}_3]^+$ ), 188 ( $[\text{M} - 4\text{CH}_3, \text{H}]^+$ ). IR (ATR):  $\text{cm}^{-1}$ : 2962, 2137, 1674, 1635 (C=N), 1597, 1455, 1365, 1249, 1193, 1168, 1092, 978, 944, 888, 799, 785, 745.

### 2-tert-Butyl-6-(3, 3-dimethyloxazoliny)phenol, HL<sup>4</sup>

A solution of 3-tert-butyl-2-hydroxybenzotrile (2.00 g, 11.4 mmol) 2-amino-2-methylpropan-1-ol (1.27 g, 14.3 mmol) was heated at reflux over zinc chloride (5 mol %) that had previously been melted *in vacuo*. The volatiles were removed *in vacuo* and the resulting oily solid was dissolved in dichloromethane, washed with saturated aqueous NaHCO<sub>3</sub> solution, and dried over MgSO<sub>4</sub>. The solution was concentrated and the desired product was obtained at -20 °C as yellow crystals (1.07 g, 4.3 mmol, 40 %).

<sup>1</sup>H NMR (300 MHz, 298 K, CDCl<sub>3</sub>) δ 12.85 (br, 1 H, OH), 7.55 (dd, 1 H, Ar-H, J = 7.8, 1.3 Hz), 7.40 (dd, 1 H, Ar-H, J = 7.7, 1.4 Hz), 6.81 (t, 1 H, Ar-H, J = 7.8 Hz), 4.10 (s, 2 H, CH<sub>2</sub>), 1.46 (s, 9 H, <sup>t</sup>Bu), 1.42 (s, 6 H, Me).

<sup>13</sup>C{<sup>1</sup>H} NMR (75.6 MHz, 298 K, CDCl<sub>3</sub>) □ 182.3 (O-C=N), 164.7 (Ar-C), 159.0 (Ar-C), 137.0 (Ar-C), 130.2 (Ar-CH), 125.9 (Ar-CH), 117.7 (Ar-CH), 78.2 (oxazoline-CH<sub>2</sub>), 67.1 (C(CH<sub>3</sub>)<sub>2</sub>), 34.8 (C(CH<sub>3</sub>)<sub>3</sub>), 29.4 (C(CH<sub>3</sub>)<sub>3</sub>).

EA found (calcd. for C<sub>15</sub>H<sub>21</sub>NO<sub>2</sub>): C: 72.65 (72.84), H 8.32 (8.56), N: 5.50(5.66)

MS M<sup>+</sup> = 206.

### 2,4-di-tert-butyl-6-(4,5-dihydrooxazol-2-yl)phenol, HL<sup>5</sup>

From 3,5-di-tert-butyl salicylic acid (2.49 g, 10 mmol) using a similar method to HL<sup>2</sup>. Purification by flash chromatography on a silica column [hexane-ethyl acetate (50:1)] afforded a pale yellow powder (1.3 g, 47%).

<sup>1</sup>H NMR (CDCl<sub>3</sub>): δ ppm 12.47 (s, 1H, OH), 7.44 (d, <sup>4</sup>J<sub>HH</sub> = 2.5 Hz, 1H, ArH), 7.33 (d, <sup>4</sup>J<sub>HH</sub> = 2.5 Hz, 1H, ArH), 4.30 (t, <sup>3</sup>J<sub>HH</sub> = 9 Hz, 2H, CH<sub>2</sub>), 3.99 (t, <sup>3</sup>J<sub>HH</sub> = 9 Hz, 2H, ArH), 1.34 (s, 9H, C(CH<sub>3</sub>)<sub>3</sub>), 1.21 (s, 9H, C(CH<sub>3</sub>)<sub>3</sub>).

<sup>13</sup>C{<sup>1</sup>H} NMR (CDCl<sub>3</sub>): δ ppm 167.1 (N=C-O), 156.8, 140.0, 136.4 (Ar), 127.9, 122.2 (Ar C-H), 109.9 (Ar), 66.5, 53.4 (CH<sub>2</sub>), 35.2, 34.3 (C(CH<sub>3</sub>)<sub>3</sub>), 31.5, 29.5 (C(CH<sub>3</sub>)<sub>3</sub>).

EA: found (calc) C: 74.20 (74.14), H: 9.35 (9.15), N: 4.98 (5.09)

MS (EI): m/z 275 (M<sup>+</sup>). IR (ATR): cm<sup>-1</sup>: 2956, 1636 (C=N), 1596, 1438, 1370, 1251, 1216, 1187, 1099, 1013, 960, 890, 799, 780, 722

**2,4-di-tert-butyl-6-(4,4-dimethyl-4,5-dihydrooxazol-2-yl)phenol, HL<sup>6</sup>**

From 3,5-di-tert-butyl salicylic acid (2.5 g, 10 mmol) using a similar method to HL<sup>2</sup>. Purification by flash chromatography on a silica column [hexane-ethyl acetate (50:1)] afforded a pale yellow powder (1.4 g, 46%).

<sup>1</sup>H NMR (CDCl<sub>3</sub>): δ ppm 12.60 (s, 1H, OH), 7.54 (d, <sup>4</sup>J<sub>HH</sub> = 2 Hz, 1H, ArH), 7.44 (d, <sup>4</sup>J<sub>HH</sub> = 2 Hz, 1H, ArH), 4.09 (s, 2H, CH<sub>2</sub>), 1.46 (s, 9H, C(CH<sub>3</sub>)<sub>3</sub>), 1.40 (s, 6H, CH<sub>3</sub>) 1.32 (s, 9H, C(CH<sub>3</sub>)<sub>3</sub>).

<sup>13</sup>C{<sup>1</sup>H} NMR (CDCl<sub>3</sub>): δ ppm 164.3 (N=C-O), 156.8, 140.0, 136.3 (Ar), 127.8, 122.0 (Ar C-H), 109.9 (Ar), 78.1 (CH<sub>2</sub>), 67.0 (C(CH<sub>3</sub>)<sub>2</sub>), 35.1, 34.2 (C(CH<sub>3</sub>)<sub>3</sub>), 31.5, 29.5 (C(CH<sub>3</sub>)<sub>3</sub>), 28.6 (CH<sub>3</sub>).

EA: found (calc) C: 75.14 (75.21), H: 9.63 (9.63), N: 4.62 (4.51).

MS (EI): m/z 303 (M<sup>+</sup>), 288 ([M-CH<sub>3</sub>]<sup>+</sup>).

IR (ATR): cm<sup>-1</sup>: 2963, 2137, 1634 (C=N), 1595, 1438, 1366, 1251, 1183, 1098, 978, 891, 805, 781, 721.

**bis(2-Methyl-6-(oxazoliny)phenolato)titanium dichloride, L<sup>1</sup><sub>2</sub>TiCl<sub>2</sub>.**

HL<sup>1</sup> (2.00 g, 11.3 mmol) was added to a suspension of sodium hydride (0.30 g, 12.4 mmol) in tetrahydrofuran and then stirred for 4 h. The peach coloured solution was cooled to -78 °C and TiCl<sub>4</sub>(THF)<sub>2</sub> (1.51 g, 4.5 mmol) was added. The solution was allowed to reach room temperature and then stirred for a further 18 h. The volatiles were removed *in vacuo* and the resulting dark orange foam was extracted with dichloromethane. The red solution was concentrated and placed in the freezer at -20°C. The title compound was obtained as red microcrystals (1.2 g, 2.8 mmol, 64 %) at -20°C.

$^1\text{H}$  NMR (300 MHz, 298 K,  $\text{CD}_2\text{Cl}_2$ )  $\delta$  7.60 (d, 1 H,  $J = 7.7$  Hz, Ar- $H$ ), 7.37 (d, 1 H,  $J = 7.2$ , Ar- $H$ ), 6.92 (t, 1 H,  $J = 7.6$  Hz, Ar- $H$ ), 4.44 (br, 1 H,  $\text{CH}_2$ ), 4.26 (br, 2 H,  $\text{CH}_2$ ), 3.75 (br, 1 H,  $\text{CH}_2$ ), 2.39 (s, 3 H, Ar- $\text{CH}_3$ ).

$^{13}\text{C}\{^1\text{H}\}$  NMR (75.6 MHz, 298 K,  $\text{CD}_2\text{Cl}_2$ )  $\square$  137.0 (Ar-CH), 127.1 (Ar-CH), 121.5 (Ar-CH), 69.0 ( $\text{CH}_2$ ), 16.3 ( $\text{CH}_3$ ).

EA found (Calc. for  $\text{C}_{20}\text{H}_{20}\text{N}_2\text{O}_4\text{TiCl}_2$ ): C: 50.79 (50.98), H: 4.22 (4.28), N: 5.79 (5.95), Cl: 15.19 (15.05).

**bis(2-methyl-6-(3, 3-dimethyloxazoliny)phenolato)titanium dichloride,  $\text{L}^2_2\text{TiCl}_2$ .**

From  $\text{HL}^2$  (1.00 g, 4.9 mmol) using a similar method as for  $\text{L}^1_2\text{TiCl}_2$  giving red microcrystals (0.8 g, 1.5 mmol, 63 %).

$^1\text{H}$  NMR (300 MHz, 298 K,  $\text{CD}_2\text{Cl}_2$ )  $\delta$  7.71 (dd, 1 H, Ar- $H$ ,  $J = 8.1, 1.5$  Hz), 7.49 (dd, 1 H, Ar- $H$ ,  $J = 7.4, 1.5$  Hz), 6.95 (t, 1 H, Ar- $H$ ,  $J = 7.8$  Hz), 4.31 (d, 1 H,  $\text{CH}_2$ ,  $J = 8.4$  Hz), 4.04 (d, 1 H,  $\text{CH}_2$ ,  $J = 8.4$  Hz), 2.42 (s, 3 H,  $\text{C}(\text{CH}_3)_2$ ), 1.76 (s, 3 H, Ar- $\text{CH}_3$ ), 1.07 (s, 3 H,  $\text{C}(\text{CH}_3)_2$ ).

$^{13}\text{C}\{^1\text{H}\}$  NMR (75.6 MHz, 298 K,  $\text{CD}_2\text{Cl}_2$ )  $\square$  167.1 (O- $\text{C}=\text{N}$ ), 163.6 (Ar-C), 137.0 (Ar-CH), 127.7 (Ar-CH), 126.8 (Ar-C), 121.3 (Ar-CH), 116.4 (Ar-C), 80.6 ( $\text{CH}_2$ ), 71.1 ( $\text{C}(\text{CH}_3)_2$ ), 29.2 ( $\text{C}(\text{CH}_3)_2$ ), 27.1 (Ar- $\text{CH}_3$ ), 16.5 ( $\text{C}(\text{CH}_3)_2$ ).

**bis(2-methyl-6-(3, 3-dimethyloxazoliny)phenolato) zirconium dichloride,  $\text{L}^2_2\text{ZrCl}_2$ .**

From  $\text{HL}^2$  (1.00 g, 4.9 mmol) using a similar method as for  $\text{L}^1_2\text{TiCl}_2$ . The pale yellow dichloromethane extract was concentrated, layered with light petroleum and cooled to  $-20$  °C to give colourless crystals (0.64 g, 1.14 mmol, 47 %).

$^1\text{H}$  NMR (300 MHz, 298 K,  $\text{CD}_2\text{Cl}_2$ )  $\delta$  7.73 (m, 1 H, Ar- $H$ ), 7.51 (dd, 1 H,  $J = 6.6, 0.8$  Hz, Ar- $H$ ), 6.95 (m, 1 H, Ar- $H$ ), 4.67, 4.25 ( $2 \times$  m, 1 H,  $\text{CH}_2$ ), 2.42 (s, 3 H,  $\text{C}(\text{CH}_3)_2$ ), 1.76 (s, 3 H, Ar- $\text{CH}_3$ ), 1.05 (s, 3H, oxazoline-Me).

$^{13}\text{C}\{^1\text{H}\}$  NMR (75.6 MHz, 298 K,  $\text{CD}_2\text{Cl}_2$ )  $\delta$  140.5 (O-C=N), 140.5 (Ar-C), 137.2 (Ar-CH), 136.2 (Ar-C), 128.4 (Ar-C), 128.1 (Ar-CH), 120.3 (Ar-CH), 80.1 (oxazoline- $\text{CH}_2$ ), 69.7 (oxazoline-CMe<sub>2</sub>), 28.7 (Ar-CH<sub>3</sub>), 27.0 (oxazoline-(CH<sub>3</sub>)<sub>2</sub>).

EA Found (calc for  $\text{C}_{24}\text{H}_{28}\text{N}_2\text{O}_4\text{ZrCl}_2(1/2 \text{CH}_2\text{Cl}_2)$ ): C, 47.97 (48.00); H, 5.20 (4.77); N, 4.28 (4.57)

**bis(2-tert-Butyl-6-(3,3-dimethyloxazoliny)phenolato)titanium dichloride, ( $\text{L}^4\text{TiCl}_2$ ).**

From HL<sup>4</sup> (2.00 g, 8.1 mmol) using a similar method as for  $\text{L}^1_2\text{TiCl}_2$ . The dichloromethane extract was concentrated and cooled to -20 °C to give shiny red crystals (1.78 g, 2.9 mmol, 73 %).

$^1\text{H}$  NMR (300 MHz, 298 K,  $\text{CD}_2\text{Cl}_2$ )  $\delta$  7.78 (dd, 1 H, J = 7.9, 1.7 Hz, Ar-H), 7.65 (dd, 1 H, J = 7.8, 1.7 Hz, Ar-H), 6.99 (t, 1 H, J = 7.8 Hz, Ar-H), 4.28, 3.94 (2 × d, 1 H, J = 8.5 Hz, CH<sub>2</sub>), 1.59 (s, 12 H, overlapping oxazoline CH<sub>3</sub>, C(CH<sub>3</sub>)<sub>3</sub>), 1.16 (s, 3 H, oxazoline CH<sub>3</sub>).

$^{13}\text{C}\{^1\text{H}\}$  NMR (75.6 MHz, 298 K,  $\text{CD}_2\text{Cl}_2$ )  $\delta$  167.5 (O-C=N), 164.2, 139.3 (Ar-C), 133.6, 121.4 (Ar-CH), 118.1 (Ar-C), 79.7 (C(CH<sub>2</sub>)<sub>2</sub>), 71.8 (C(CH<sub>3</sub>)<sub>2</sub>), 35.4 (C(CH<sub>3</sub>)<sub>3</sub>), 30.4 (C(CH<sub>3</sub>)<sub>3</sub>), 28.6, 25.7 (oxazoline-CH<sub>3</sub>).

EA found (Calc. for  $\text{C}_{30}\text{H}_{40}\text{N}_2\text{O}_4\text{TiCl}_2(1/2 \text{CH}_2\text{Cl}_2)$ ): C: 57.53 (57.43), H: 6.51 (6.45), N: 4.48 (4.43), Cl: 13.10 (14.01).

**bis(2-tert-Butyl-6-(3,3-dimethyloxazoliny)phenolato)zirconium dichloride, ( $\text{L}^4_2\text{ZrCl}_2$ ).**

From HL<sup>4</sup> (2.00 g, 8.1 mmol) using a similar method as for  $\text{L}^1_2\text{TiCl}_2$ . The dichloromethane extract was concentrated and cooled to -20 °C to give pale yellow crystals (1.9 g, 2.8 mmol, 68 %).

$^1\text{H}$  NMR (300 MHz, 298 K,  $\text{CD}_2\text{Cl}_2$ )  $\delta$  7.80 (dd, 1 H, J = 8.0, 1.7 Hz, Ar-H), 7.62 (dd, 1 H, J = 7.7, 1.7 Hz, Ar-H), 6.93 (t, 1 H, J = 7.9 Hz, Ar-H), 4.26, 4.00 (2 × d, 1 H, J = 8.5 Hz, CH<sub>2</sub>), 1.56 (s, 12 H, overlapping C(CH<sub>3</sub>)<sub>3</sub>, oxazoline CH<sub>3</sub>), 1.17 (s, 3 H, oxazoline CH<sub>3</sub>).

$^{13}\text{C}\{^1\text{H}\}$  NMR (75.6 MHz, 298 K,  $\text{CD}_2\text{Cl}_2$ )  $\delta$  169.4 (O-C=N), 161.9 (Ar-C), 140.3 (Ar-C), 133.7 (Ar-CH), 128.7 (Ar-CH), 120.1 (Ar-CH), 116.1 (Ar-C), 79.3 (oxazoline-CH<sub>2</sub>), 70.2 (oxazoline-C(CH<sub>3</sub>)<sub>2</sub>), 35.3 (C(CH<sub>3</sub>)<sub>3</sub>), 30.1 (C(CH<sub>3</sub>)<sub>3</sub>), 29.0 (oxazoline-CH<sub>3</sub>)<sub>2</sub>, 26.4 (oxazoline-C(CH<sub>3</sub>)<sub>2</sub>).

EA found (Calc. for  $C_{30}H_{40}N_2O_4ZrCl_2(2/5CH_2Cl_2)$ ): C, 53.07 (53.01), H: 5.72 (5.97), N: 3.96 (4.07); Cl: 13.37 (14.41)

**bis(2,6-di-tert-Butyl-6-(3,3-dihydrooxazoliny)phenolato)titanium dichloride,  $L^5_2TiCl_2$ .**

To a stirred solution of  $TiCl_4$  (0.46 ml of 10% v/v solution in dichloromethane, 0.42 mmol) at  $-78\text{ }^\circ\text{C}$  was added  $HL^5$  (0.240 g, 0.42 mmol) in dichloromethane. The vessel was allowed to warm to room temperature, and stirring was continued for 16 h. The solution was filtered *via* cannula, and the volatiles were then removed *in vacuo*. The solid was sublimated at  $275\text{ }^\circ\text{C}$ , yielding 0.179 g as a red powder (63 %).

$^1H$  NMR<sup>1</sup> 500 MHz ( $d_8$ -toluene, 253 K):  $\delta$  ppm [7.87, 7.85, 7.74, 7.60 (4 x d,  $^4J_{HH} = 2\text{ Hz}$ , 1H, *ArH*), 7.85, 7.80 (2 x d,  $^4J_{HH} = 2\text{ Hz}$ , 1H, *ArH*), 2.8–4.7 (overlapping multiplets from both isomers, 4H from each,  $CH_2-CH_2$ ), 1.85, 1.31 (2 x s, 9H, *t*Bu), [1.40, 1.31, 1.27, 1.23 (4 x s, 9H, *t*Bu)].

$^{13}C\{^1H\}$  NMR 125 MHz ( $d_8$ -toluene):  $\delta$  ppm 166.3 (N=C), 162.4, 142.9, 139.1, (*Ar*) 130.7, 123.7 (*Ar C-H*), 115.4 (*Ar*), 79.2 (O- $CH_2-CH_2$ -N), 54.6 (O- $CH_2-CH_2$ -N), 35.8, 34.7 ( $C(CH_3)_3$ ), 31.5, 30.17 ( $C(CH_3)_3$ ).

EA: found (calc) C: 59.64 (61.18), H: 7.01 (7.25), N: 3.98 (4.20).

MS ( $EI^+$ ):  $m/z$  666 ( $M^+$ ), 631 ( $[M-Cl]^+$ ), 596 ( $[M-2Cl]^+$ )

**bis(2,6-di-tert-Butyl-6-(3,3-dihydrooxazoliny)phenolato)zirconium dichloride,  $L^5_2ZrCl_2$ .**

To  $HL^5$  (0.204 g, 0.711 mmol) in a Schlenk vessel under argon was added NaH (35 mg, 1.5 mmol), and then THF (20 ml) with stirring. The mixture was stirred for 20 h. Stirring was ceased, allowing excess NaH to settle out. The solution was filtered *via* cannula into another Schlenk vessel containing  $[ZrCl_4]$  (83 mg, 0.36 mmol) with stirring. The mixture turned from pale to slightly darker yellow. Stirring was continued for 20 h, and then ceased to allow NaCl precipitate to settle, before

---

<sup>1</sup> Resonances arising from the minor *cis-cis-cis* isomer (*ca.* 25%) are enclosed in square brackets in the  $^1H$  spectrum. The  $^1H$  signals from the oxazole  $CH_2-CH_2$  protons or both isomers overlap considerably, precluding detailed assignment of this region of the spectrum. Assignment of minor isomer peaks in  $^{13}C$  was not feasible. Integrals are consistent within each species.

filtering the solution *via* cannula. The solvent was removed *in vacuo*, yielding a crude product which was purified by sublimation at 275-300 °C, yielding 99.9 mg (20%).

$^1\text{H}$  NMR ( $\text{CD}_2\text{Cl}_2$ ):  $\delta$  ppm 7.68 (d,  $^4J_{\text{HH}} = 2.5$  Hz, 1H, ArH), 7.63 (d,  $^4J_{\text{HH}} = 2.5$  Hz, 1H, ArH), 4.48 (br. m, 2H,  $\text{CH}_2$ ), 3.7-4.2 (br, 2H,  $\text{CH}_2$ ), 1.50 (s, 9H,  $^t\text{Bu}$ ), 1.29 (s, 9H,  $^t\text{Bu}$ ).

$^{13}\text{C}\{^1\text{H}\}$  NMR ( $\text{CD}_2\text{Cl}_2$ ):  $\delta$  ppm 169.5 (oxazole N=C-O), 159.9, 142.5, 139.0 (Ar) 131.3, 124.3 (Ar C-H), 113.7 (Ar) 68.2 ( $\text{CH}_2$ ), 35.6, 34.8 ( $\text{C}(\text{CH}_3)_3$ ), 31.5 29.8 ( $\text{C}(\text{CH}_3)_3$ ).

EA: found (calc) C: 57.28 (57.44), H: 6.71 (6.81), N: 4.02 (3.61).

MS ( $\text{EI}^+$ ):  $m/z$  708 ( $\text{M}^+$ ), 694 ( $[\text{M}-\text{CH}_3]^+$ ).

### **bis(2,6-di-tert-Butyl-6-(3,3-dimethyloxazolinyl)phenolato)titanium dichloride, $\text{L}^6_2\text{TiCl}_2$ .**

From  $\text{HL}^6$  (0.330 g, 1.09 mmol) using a similar method to  $\text{L}^5_2\text{ZrCl}_2$ . The product was sublimated at 290 °C, yielding 0.285 g of red crystalline solid (70%).

$^1\text{H}$  NMR ( $\text{CD}_2\text{Cl}_2$ ):  $\delta$  ppm 7.80 (d,  $^4J_{\text{HH}} = 2$  Hz, 1H, ArH), 7.75 (d,  $^4J_{\text{HH}} = 2$  Hz, 1H, ArH), 4.31 (d,  $^2J_{\text{HH}} = 8$  Hz, 1H, oxazole  $\text{CH}_2$ ), 3.98 (d,  $^2J_{\text{HH}} = 2$  Hz, 1H, oxazole  $\text{CH}_2$ ), 1.64 (s, 3H,  $\text{CH}_3$ ), 1.63 (s, 9H,  $^t\text{Bu}$ ), 1.39 (s, 9H,  $^t\text{Bu}$ ), 1.20 (s, 3H,  $\text{CH}_3$ ).

$^{13}\text{C}\{^1\text{H}\}$  NMR ( $\text{CD}_2\text{Cl}_2$ ):  $\delta$  ppm 167.8 (N=C), 162.3, 143.8, 138.5 (Ar) 131.4, 124.6 (Ar C-H), 117.4 (Ar), 79.7 (O-C-C( $\text{CH}_3$ ) $_2$ ), 71.8 (C-C( $\text{CH}_3$ ) $_2$ -N), 35.7, 34.9 ( $\text{C}(\text{CH}_3)_3$ ), 31.5, 30.5 ( $\text{C}(\text{CH}_3)_3$ ), 28.8, 25.9 ( $\text{C}(\text{CH}_3)_2$ ).

EA: found (calc) C: 62.84 (63.07), H: 7.78 (7.80), N: 3.87 (3.76).

MS ( $\text{EI}^+$ ):  $m/z$  722 ( $\text{M}^+$ ), 687 ( $[\text{M}-\text{Cl}]^+$ ), 652 ( $[\text{M}-2\text{Cl}]^+$ ), 420 ( $[\text{M}-\text{L}^{11}]^+$ ), 302 ( $[\text{L}^{11}]^+$ ).

### **bis(2,6-di-tert-Butyl-6-(3,3-dimethyloxazolinyl)phenolato)zirconium dichloride, $\text{L}^6_2\text{ZrCl}_2$ .**

From  $\text{HL}^6$  (0.318 g, 1.05 mmol) using a similar method to  $\text{L}^5_2\text{ZrCl}_2$ . The crude product was recrystallised from dichloromethane/pentane, yielding 0.180 g of pale yellow crystalline solid (44%).

$^1\text{H}$  NMR ( $\text{CD}_2\text{Cl}_2$ ):  $\delta$  ppm 7.80 (d,  $^4J_{\text{HH}} = 2.5$  Hz, 1H, ArH), 7.71 (d,  $^4J_{\text{HH}} = 2.5$  Hz, 1H, ArH), 4.30 (d,  $^2J_{\text{HH}} = 8.5$  Hz, 1H,  $\text{CH}_2$ ), 4.03 (d,  $^2J_{\text{HH}} = 8.5$  Hz, 1H,  $\text{CH}_2$ ), 1.60 (s, 3H,  $\text{CH}_3$ ), 1.59 (s, 9H,  $^t\text{Bu}$ ), 1.37 (s, 9H,  $^t\text{Bu}$ ), 1.22 (s, 3H,  $\text{CH}_3$ ).



$^{13}\text{C}\{^1\text{H}\}$  NMR ( $\text{CD}_2\text{Cl}_2$ ):  $\delta$  ppm 169.5 (N=C), 159.7, 142.1, 139.2, (Ar) 131.4, 124.5 (Ar C-H), 117.4 (Ar), 79.2 (O-C-C( $\text{CH}_3$ ) $_2$ ), 69.9 (C-C( $\text{CH}_3$ ) $_2$ -N), 35.4, 34.6 (C( $\text{CH}_3$ ) $_3$ ), 31.3, 30.0 (C( $\text{CH}_3$ ) $_3$ ), 28.9, 26.3 (C( $\text{CH}_3$ ) $_2$ ).

EA: found (calc) C: 59.55 (59.51), H: 7.28 (7.36), N: 3.74 (3.65). MS ( $\text{EI}^+$ ):  $m/z$  766 ( $\text{M}^+$ ), 751 ( $[\text{M}-\text{CH}_3]^+$ ), 730 ( $[\text{M}-\text{Cl}]^+$ ).

**bis(2,6-di-isopropyl-6-(3,3-dimethyloxazoliny)phenolato)titanium dichloride,  $\text{L}^3_2\text{TiCl}_2$ .**

From  $\text{HL}^3$  (0.233 g, 0.85 mmol) using a similar method to  $\text{L}^5_2\text{ZrCl}_2$ . The crude product was sublimated at 275 °C, yielding 0.098 g of red crystalline solid (35%).

$^1\text{H}$  NMR ( $\text{CD}_5\text{Br}$ ):  $\delta$  ppm 7.75 (d,  $^4J_{\text{HH}} = 2$  Hz, 1H, ArH), 7.46 (d,  $^4J_{\text{HH}} = 2$  Hz, 1H, ArH), 3.89 (sept.,  $^3J_{\text{HH}} = 7$  Hz, 1H CH( $\text{CH}_3$ ) $_2$ ), 3.83 (d,  $^3J_{\text{HH}} = 8$  Hz, 1H, O-CH $_2$ ) 3.61 (d,  $^3J_{\text{HH}} = 8$  Hz, 1H, O-CH $_2$ ) 2.81 (sept.,  $^3J_{\text{HH}} = 7$  Hz, 1H CH( $\text{CH}_3$ ) $_2$ ), 1.76 (s, 1H, CH $_3$ ) 1.53 (d,  $^3J_{\text{HH}} = 7$  Hz, 3H, CH( $\text{CH}_3$ ) $_2$ ) 1.38 (d,  $^3J_{\text{HH}} = 7$  Hz, 3H, CH( $\text{CH}_3$ ) $_2$ ) 1.20 (d,  $^3J_{\text{HH}} = 7$  Hz, 3H, CH( $\text{CH}_3$ ) $_2$ ) 1.19 (d,  $^3J_{\text{HH}} = 7$  Hz, 3H, CH( $\text{CH}_3$ ) $_2$ ) 0.94 (s, 1H, CH $_3$ ).

$^{13}\text{C}\{^1\text{H}\}$  NMR ( $\text{CD}_5\text{Br}$ ): , 137.0, 133.1, 120.2, 111.8, 75.5, 66.4, 29.6, 24.9, 20.2, 20.0, 19.8, 18.0, 23.8, 22.5.

EA: found (calc) C: 60.95 (61.18) H: 7.14 (7.25), N: 4.16 (4.20).

MS ( $\text{EI}^+$ ):  $m/z$  666 ( $\text{M}^+$ ), 631 ( $[\text{M}-\text{Cl}]^+$ ).

**bis(2,6-di-isopropyl-6-(3,3-dimethyloxazoliny)phenolato)zirconium dichloride,  $\text{L}^3_2\text{ZrCl}_2$ .**

From  $\text{HL}^3$  (0.441 g, 1.6 mmol) using a similar method to  $\text{L}^5_2\text{ZrCl}_2$ . The crude product was sublimated at 275 °C, yielding 0.066 g of yellow solid (6%).

$^1\text{H}$  NMR $^2$  ( $d_5$ -pyridine):  $\delta$  ppm 7.83 (d,  $^4J_{\text{HH}} = 2$  Hz, 1H, ArH), 7.63 (d,  $^4J_{\text{HH}} = 2$  Hz, 1H, ArH), 3.6-4.3 (m, 6H, overlapping signals from O-CH $_2$ , CH( $\text{CH}_3$ ) $_2$ ), 2.8-3.0 (m, 2H, overlapping signals from

---

$^2$  Two isomers present in a ratio *ca.* 4:1 with many overlapping peaks. Detailed assignment not feasible. Not sufficiently soluble for  $^{13}\text{C}$  NMR spectroscopy.

$CH(CH_3)_2$  from both isomers). 1.92 (s, 3H,  $CH_3$ ), 1.35-1.50 (m, 12H, overlapping  $CH_3$  signals) 1.15-1.30 (m, 18H, overlapping  $CH_3$  signals).

EA: found (calc) C: 56.58 (57.44) H: 6.74 (6.81), N: 3.90 (3.94). MS ( $EI^+$ ): m/z 708 ( $M^+$ ), 694 ( $M-CH_3$ )<sup>+</sup>, 673 ( $[M-Cl]^+$ ).

**bis(2,6-di-tert-Butyl-6-(3,3-dimethyloxazoliny)phenolato)zirconium dibenzyl,  $L^5Zr(CH_2Ph)_2$**

To HL<sup>5</sup> (0.175 g, 0.61 mmol), in a Schlenk vessel under argon was added  $Zr(CH_2Ph)_2$  (0.139 g, 0.5 eq), and the mixture made up with pentane, at -78 °C with stirring and the exclusion of light. The mixture was allowed to warm to r.t, and stirred for 3h. The product was recrystallised from pentane, yielding 0.110 g of pale yellow powder (44%).

<sup>1</sup>H NMR 400 MHz ( $C_6D_6$ ):  $\delta$  ppm 8.07 (d, <sup>4</sup> $J_{HH} = 2$  Hz, 1H, ArH), 7.86 (br. s, 1H, ArH), 6.9-7.2 (m, 4H, overlapping benzyl  $C_6H_5$  signals), 6.75 (m, 1H,  $C_6H_5$ ), 3-4 (br. m, 4H,  $CH_2-CH_2$ ), 2.92 (br. s, 2H,  $CH_2Ph$ ), 1.87 (br. s, 9H,  $C(CH_3)_3$ ), 1.43 (s, 9H,  $C(CH_3)_3$ )

EA: found (calc) C: 65.78 (70.11), H: 7.46 (7.60), N: 3.64 (3.41)

MS ( $EI^+$ ): m/z 820 ( $M^+$ ), 729 ( $[M-(CH_2Ph)]^+$ )

**bis(2,6-di-tert-Butyl-6-(3,3-dimethyloxazoliny)phenolato)zirconium dibenzyl,  $L^6Zr(CH_2Ph)_2$**

To HL<sup>6</sup> (0.320 g, 1.06 mmol), in a Schlenk vessel under argon was added  $Zr(CH_2Ph)_2$  (240 mg, 0.5 eq), and the mixture made up with toluene, with stirring and the exclusion of light. The mixture was stirred for 30 min, then the solvent removed in vacuo. The product was recrystallised from pentane, yielding 0.250 g of deep yellow powder (27%).

<sup>1</sup>H NMR 400 MHz ( $d_8$ -toluene):  $\delta$  ppm 8.03, 7.80 (2 x d, <sup>4</sup> $J_{HH} = 3$  Hz, 1H, ArH), 6.89 (m, 4H, overlapping benzyl  $C_6H_5$  signals), 6.60-6.66 (m, 1H,  $C_6H_5$ ), 3.30, 3.20 (2 x d, <sup>2</sup> $J_{HH} = 8$  Hz, 1H, O- $CH_2$ ), 2.92, 2.80 (2 x d, 1H, <sup>2</sup> $J_{HH} = 11$  Hz,  $CH_2Ph$ ), 1.78, 1.32 (2 x s, 9H,  $C(CH_3)_3$ ), 0.98, 0.73 (2 x s, 3H, N- $C(CH_3)_2$ )

$^{13}\text{C}\{^1\text{H}\}$  NMR 100 MHz ( $d_8$ -toluene):  $\delta$  ppm 168.3 (N=C), 161.0, 150.2, 141.1, 139.3 (Ar), 130.7, 127.8, 126.5, 124.8, 120.1 (Ar C-H), 116.5 (Ar), 78.0 (O-C-C(CH<sub>3</sub>)<sub>2</sub>), 72.0 (CH<sub>2</sub>Ph), 69.2 (C-C(CH<sub>3</sub>)<sub>2</sub>-N), 35.9, 34.7 (C(CH<sub>3</sub>)<sub>3</sub>), 31.8, 31.7 (C(CH<sub>3</sub>)<sub>3</sub>), 27.7, 26.5 (C(CH<sub>3</sub>)<sub>2</sub>)

EA: found (calc) C: 69.50 (71.11), H: 8.00 (8.03), N: 3.08 (3.19)

MS (EI<sup>+</sup>): m/z 878(M<sup>+</sup>), 785 ([M-(CH<sub>2</sub>Ph)]<sup>+</sup>)

**bis(2,6-di-isopropyl-6-(3,3-dimethyloxazoliny)phenolato)zirconium dibenzyl, L<sup>3</sup>Zr(CH<sub>2</sub>Ph)<sub>2</sub>**

To HL<sup>3</sup> (0.183 g, 0.66 mmol), in a Schlenk vessel under argon was added Zr(CH<sub>2</sub>Ph)<sub>2</sub> (0.152 g, 0.5 eq), and the mixture made up with toluene, with stirring and the exclusion of light. The mixture was stirred for 30 min, then the solvent removed in vacuo. The product was recrystallised from pentane, yielding 0.140 g of deep yellow powder (26%).

$^1\text{H}$  NMR 400 MHz (C<sub>6</sub>D<sub>6</sub>):  $\delta$  ppm 7.85, 7.46 (2 x d,  $^4J_{\text{HH}} = 2$  Hz, 1H, ArH), 7.00-7.10 (m, 4H, overlapping benzyl C<sub>6</sub>H<sub>5</sub> signals), 6.70-6.86 (m, 1H, C<sub>6</sub>H<sub>5</sub>), 4.03 (sept.,  $^3J_{\text{HH}} = 7$  Hz, 1H, CH(CH<sub>3</sub>)<sub>2</sub>), 3.38, 3.30 (2 x d,  $^2J_{\text{HH}} = 8$  Hz, 1H, O-CH<sub>2</sub>), 2.82 (sept.,  $^3J_{\text{HH}} = 7$  Hz, 1H, CH(CH<sub>3</sub>)<sub>2</sub>) 2.74, 2.69 (2 x d, 1H,  $^2J_{\text{HH}} = 11$  Hz, CH<sub>2</sub>Ph), 1.54, 1.46 (2 x d,  $^3J_{\text{HH}} = 7$  Hz, 3H, CH(CH<sub>3</sub>)<sub>2</sub>), 1.28 (s, 3H, N-C(CH<sub>3</sub>)<sub>2</sub>), 1.27, 1.25 (2 x d,  $^3J_{\text{HH}} = 7$  Hz, 3H, CH(CH<sub>3</sub>)<sub>2</sub>), 0.70 (s, 3H, N-C(CH<sub>3</sub>)<sub>2</sub>)

$^{13}\text{C}\{^1\text{H}\}$  NMR 100 MHz (C<sub>6</sub>D<sub>6</sub>):  $\delta$  ppm 167.5 (N=C), 159.1, 149.6, 139.4, 138.9 (Ar), 130.1, 126.3, 124.6, 120.1 (Ar C-H), 114.8 (Ar), 78.3 (O-C-C(CH<sub>3</sub>)<sub>2</sub>), 70.4 (CH<sub>2</sub>Ph), 68.8 (C-C(CH<sub>3</sub>)<sub>2</sub>-N), 34.0, 26.7 (CH(CH<sub>3</sub>)<sub>2</sub>), 27.8, 27.7, 24.4, 24.4 (CH(CH<sub>3</sub>)<sub>2</sub>), 23.9, 23.5 (C(CH<sub>3</sub>)<sub>2</sub>)

EA: found (calc) C: 69.21 (70.11), H: 7.48 (7.60), N: 3.52 (3.41)

MS (EI<sup>+</sup>): m/z 729 ([M-(CH<sub>2</sub>Ph)]<sup>+</sup>)

## Reactions of $L^6ZrCl_2$ with MAO/ $AlMe_3$

$L^6ZrCl_2$  reacts with MAO-2 ( $Al/Zr = 45$ ,  $[Zr] = 0.004$  M) to give multiple unidentified species with broadened lines. After storing this sample for 2d at RT,  $L^6ZrCl_2$  is completely converted to  $L^6AlMe_2 \cdot MAO$ . The latter was assigned by comparison of its  $^1H$  NMR spectrum with that for  $L^6AlMe_2$  formed in the system  $L^6ZrCl_2/AlMe_3/MAO$  ( $Zr:Al:Al_{MAO} = 1:85:3.5$ ); MAO was added as a catalyst of ligand exchange process. NMR shifts of  $L^6AlMe_2$  slightly differ from those of  $L^6AlMe_2 \cdot MAO$ . See Figure 1 overleaf.

$^1H$  NMR spectrum of  $L^6ZrCl_2$  (toluene- $d_8$ , 20 °C,  $\delta$ ): 8.02 (d, 1H,  $J=2.6$  Hz, aryl), 7.81 (d, 1H,  $J=2.6$  Hz, aryl), 3.46 (d, 1H,  $J= 8.3$  Hz,  $CHH$ ), 3.29 (d, 1H,  $J= 8.3$  Hz,  $CHH$ ), 1.82 (s, 18H, tBu), 1.46 (s, 6H,  $C(CH_3)CH_3$ ), 1.28 (s, 18H, tBu), 0.90 (s, 6H,  $C(CH_3)CH_3$ ).

$L^6AlMe_2$  (toluene- $d_8$ , 20 °C,  $\delta$ ): 7.72 (d, 1H,  $J=2.7$  Hz, aryl), 7.68 (d, 1H,  $J=2.6$  Hz, aryl), 3.26 (s, 2H,  $CH_2$ ), 1.57 (s, 9H, tBu), 1.30 (s, 9H, tBu), 0.92 (s, 6H,  $C(CH_3)_2$ ).

$L^6AlMe_2$  (toluene- $d_8$ , -5 °C,  $\delta$ ): 7.78 (d, 1H,  $J=2.7$  Hz, aryl), 7.70 (d, 1H,  $J=2.6$  Hz, aryl), 3.12 (s, 2H,  $CH_2$ ), 1.61 (s, 9H, tBu), 1.32 (s, 9H, tBu), 0.85 (s, 6H,  $C(CH_3)_2$ ), -0.26 (s, 6H,  $Al(CH_3)_2$ ).

$L^6AlMe_2 \cdot MAO$  (toluene- $d_8$ , 20 °C,  $\delta$ ): 7.77 (unresolved, 1H, aryl), 7.71 (unresolved, 1H, aryl), 3.27 (s, 2H,  $CH_2$ ), 1.61 (s, 9H, tBu), 1.35 (s, 9H, tBu), 0.95 (s, 6H,  $C(CH_3)_2$ ).

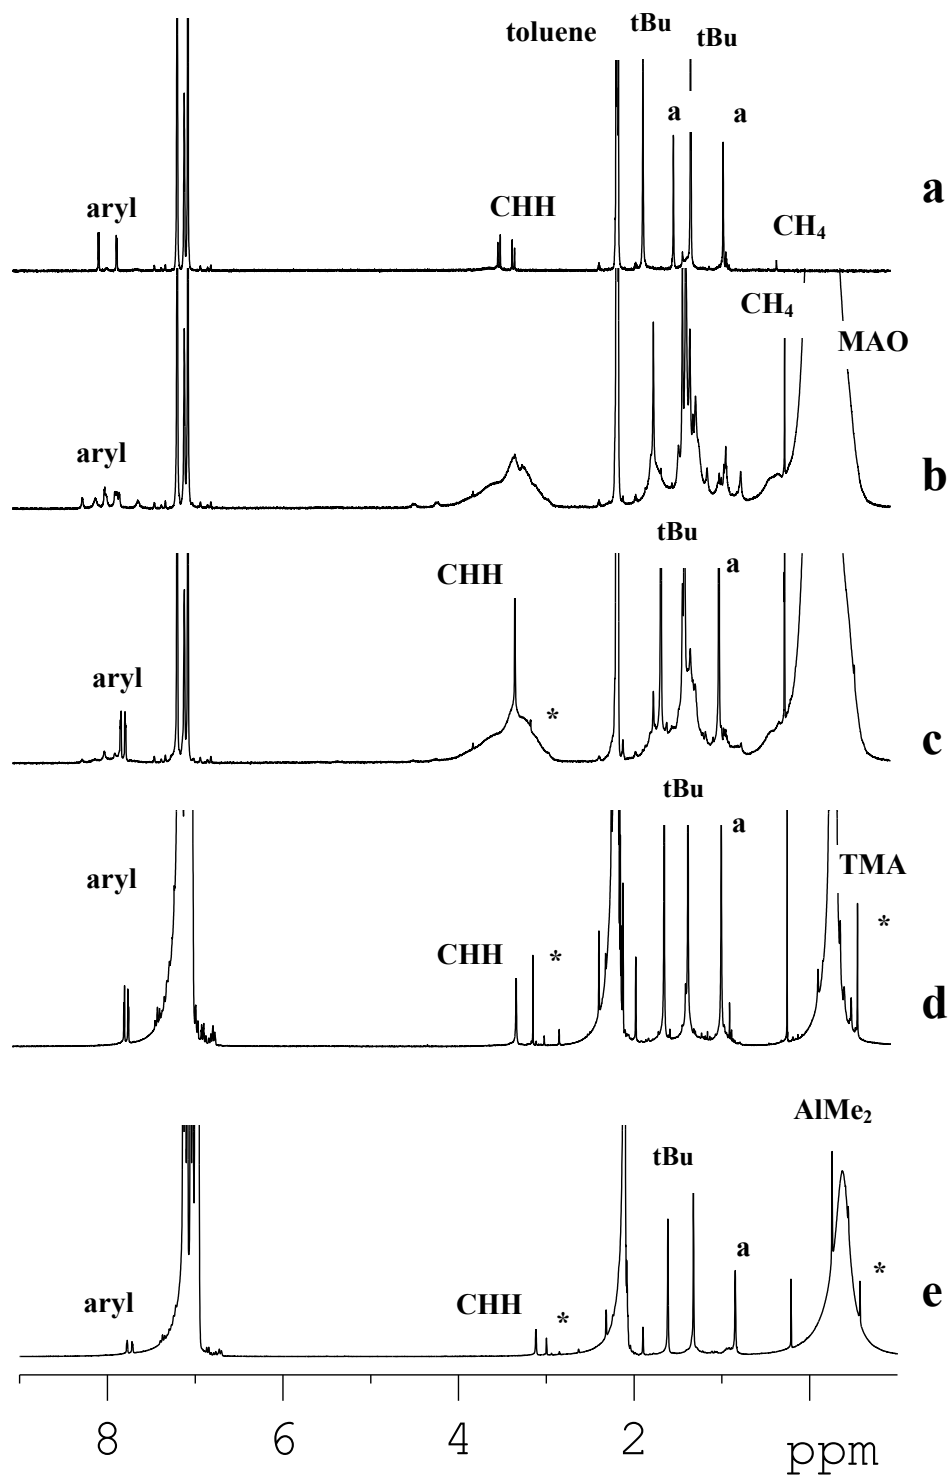

Figure 1.  $^1\text{H}$  NMR spectra (toluene- $d_8$ , 20 °C unless otherwise noted) of complex  $\text{Zr}(\text{Sal}')_2\text{Cl}_2$  (a); the system  $\text{Zr}(\text{Sal}')_2\text{Cl}_2/\text{MAO-2}$ ,  $\text{Al}/\text{Zr}=45$ ,  $[\text{Zr}] = 0.004 \text{ M}$  (b); the same system in 2 days (c);  $\text{Zr}(\text{Sal}')_2\text{Cl}_2/\text{AlMe}_3/\text{MAO}$ ,  $\text{Zr}:\text{Al}:\text{Al}_{\text{MAO}}=1:85:3.5$  in 1 day (d); the same at -5 °C (e). 'a' stand for  $\text{C}(\text{CH}_3)_2$  peaks. Asterisks mark impurities in MAO or TMA.

**Table 1.** Crystal data and structure refinement of [L<sub>2</sub>ZrCl<sub>2</sub>].

|                                            |                                                                                  |                     |
|--------------------------------------------|----------------------------------------------------------------------------------|---------------------|
| Identification code                        | <b>04src0192</b>                                                                 |                     |
| Empirical formula                          | C <sub>24</sub> H <sub>28</sub> Cl <sub>2</sub> N <sub>2</sub> O <sub>4</sub> Zr |                     |
| Formula weight                             | 570.60                                                                           |                     |
| Temperature                                | 120(2) K                                                                         |                     |
| Wavelength                                 | 0.71073 Å                                                                        |                     |
| Crystal system                             | Orthorhombic                                                                     |                     |
| Space group                                | P2 <sub>1</sub> 2 <sub>1</sub> 2 <sub>1</sub>                                    |                     |
| Unit cell dimensions                       | $a = 11.4174(18) \text{ \AA}$                                                    | $\alpha = 90^\circ$ |
|                                            | $b = 13.9809(9) \text{ \AA}$                                                     | $\beta = 90^\circ$  |
|                                            | $c = 15.0376(17) \text{ \AA}$                                                    | $\gamma = 90^\circ$ |
| Volume                                     | 2400.4(5) Å <sup>3</sup>                                                         |                     |
| Z                                          | 4                                                                                |                     |
| Density (calculated)                       | 1.579 Mg / m <sup>3</sup>                                                        |                     |
| Absorption coefficient                     | 0.715 mm <sup>-1</sup>                                                           |                     |
| $F(000)$                                   | 1168                                                                             |                     |
| Crystal                                    | Plate; Colourless                                                                |                     |
| Crystal size                               | 0.40 × 0.20 × 0.04 mm <sup>3</sup>                                               |                     |
| $\theta$ range for data collection         | 3.08 – 27.48°                                                                    |                     |
| Index ranges                               | -14 ≤ $h$ ≤ 14, -18 ≤ $k$ ≤ 16, -19 ≤ $l$ ≤ 19                                   |                     |
| Reflections collected                      | 26703                                                                            |                     |
| Independent reflections                    | 5479 [ $R_{int} = 0.0502$ ]                                                      |                     |
| Completeness to $\theta = 27.48^\circ$     | 99.6 %                                                                           |                     |
| Absorption correction                      | Semi-empirical from equivalents                                                  |                     |
| Max. and min. transmission                 | 0.9720 and 0.7631                                                                |                     |
| Refinement method                          | Full-matrix least-squares on $F^2$                                               |                     |
| Data / restraints / parameters             | 5479 / 0 / 305                                                                   |                     |
| Goodness-of-fit on $F^2$                   | 1.032                                                                            |                     |
| Final $R$ indices [ $F^2 > 2\sigma(F^2)$ ] | $RI = 0.0286$ , $wR2 = 0.0618$                                                   |                     |
| $R$ indices (all data)                     | $RI = 0.0368$ , $wR2 = 0.0648$                                                   |                     |
| Absolute structure parameter               | -0.04(3)                                                                         |                     |
| Extinction coefficient                     | 0.0023(3)                                                                        |                     |

Largest diff. peak and hole

0.463 and  $-0.440 \text{ e \AA}^{-3}$

---

**Diffraction:** *Nonius KappaCCD* area detector ( $\phi$  scans and  $\omega$  scans to fill *asymmetric unit* sphere). **Cell determination:** DirAx (Duisenberg, A.J.M.(1992). *J. Appl. Cryst.* 25, 92-96.) **Data collection:** Collect (Collect: Data collection software, R. Hooft, Nonius B.V., 1998). **Data reduction and cell refinement:** *Denzo* (Z. Otwinowski & W. Minor, *Methods in Enzymology* (1997) Vol. 276: *Macromolecular Crystallography*, part A, pp. 307-326; C. W. Carter, Jr. & R. M. Sweet, Eds., Academic Press). **Absorption correction:** *SORTAV* (R. H. Blessing, *Acta Cryst.* A51 (1995) 33-37; R. H. Blessing, *J. Appl. Cryst.* 30 (1997) 421-426). **Structure solution:** *SHELXS97* (G. M. Sheldrick, *Acta Cryst.* (1990) A46 467-473). **Structure refinement:** *SHELXL97* (G. M. Sheldrick (1997), University of Göttingen, Germany). **Graphics:** *Cameron* - A Molecular Graphics Package. (D. M. Watkin, L. Pearce and C. K. Prout, Chemical Crystallography Laboratory, University of Oxford, 1993).

**Special details:**

All hydrogen atoms were fixed.

**Table 2.** Atomic coordinates [ $\times 10^4$ ], equivalent isotropic displacement parameters [ $\text{\AA}^2 \times 10^3$ ] and site occupancy factors.

$U_{eq}$  is defined as one third of the trace of the orthogonalized  $U^{ij}$  tensor.

| Atom | $x$     | $y$      | $z$     | $U_{eq}$ | <i>S.o.f.</i> |
|------|---------|----------|---------|----------|---------------|
| C11  | 437(1)  | 1603(1)  | 8532(1) | 23(1)    | 1             |
| C12  | 736(1)  | 1626(1)  | 6197(1) | 25(1)    | 1             |
| Zr1  | 2014(1) | 1521(1)  | 7483(1) | 14(1)    | 1             |
| C1   | 3863(2) | 530(2)   | 6143(2) | 16(1)    | 1             |
| C2   | 4987(2) | 1545(2)  | 5397(2) | 33(1)    | 1             |
| C3   | 4245(2) | 2101(2)  | 6057(2) | 21(1)    | 1             |
| C4   | 3450(3) | 2787(2)  | 5576(2) | 33(1)    | 1             |
| C5   | 4995(3) | 2605(2)  | 6733(2) | 39(1)    | 1             |
| C6   | 3451(2) | -431(2)  | 6331(2) | 16(1)    | 1             |
| C7   | 2613(2) | -597(2)  | 6980(2) | 16(1)    | 1             |
| C8   | 2216(2) | -1525(2) | 7151(2) | 20(1)    | 1             |
| C9   | 2651(2) | -2254(2) | 6639(2) | 23(1)    | 1             |
| C10  | 3463(2) | -2097(2) | 5983(2) | 23(1)    | 1             |
| C11  | 3873(2) | -1195(2) | 5827(2) | 21(1)    | 1             |
| C12  | 1308(3) | -1689(2) | 7840(2) | 30(1)    | 1             |
| N1   | 3550(2) | 1331(2)  | 6492(1) | 16(1)    | 1             |
| O1   | 4669(2) | 572(1)   | 5509(1) | 24(1)    | 1             |
| O2   | 2174(1) | 131(1)   | 7432(1) | 17(1)    | 1             |
| C21  | 3417(2) | 2314(2)  | 9157(2) | 17(1)    | 1             |
| C22  | 4289(2) | 1212(2)  | 9992(2) | 21(1)    | 1             |
| C23  | 3918(2) | 758(2)   | 9117(2) | 17(1)    | 1             |
| C24  | 3161(2) | -108(2)  | 9293(2) | 23(1)    | 1             |
| C25  | 4958(2) | 506(2)   | 8544(2) | 23(1)    | 1             |
| C26  | 2968(2) | 3269(2)  | 9017(2) | 17(1)    | 1             |
| C27  | 2494(2) | 3538(2)  | 8206(2) | 19(1)    | 1             |
| C28  | 2121(2) | 4474(2)  | 8068(2) | 22(1)    | 1             |
| C29  | 2174(2) | 5103(2)  | 8762(2) | 25(1)    | 1             |
| C30  | 2619(2) | 4840(2)  | 9578(2) | 26(1)    | 1             |



|     |         |         |         |       |   |
|-----|---------|---------|---------|-------|---|
| C31 | 3034(2) | 3930(2) | 9704(2) | 21(1) | 1 |
| C32 | 1669(3) | 4763(2) | 7179(2) | 30(1) | 1 |
| N21 | 3253(2) | 1557(2) | 8688(1) | 14(1) | 1 |
| O21 | 4070(2) | 2217(1) | 9881(1) | 20(1) | 1 |
| O22 | 2391(1) | 2903(1) | 7552(1) | 20(1) | 1 |

---

**Table 3.** Bond lengths [Å] and angles [°].

|         |            |          |          |
|---------|------------|----------|----------|
| C11–Zr1 | 2.3964(6)  | C9–H9    | 0.9500   |
| C12–Zr1 | 2.4275(6)  | C10–C11  | 1.366(4) |
| Zr1–O2  | 1.9532(14) | C10–H10  | 0.9500   |
| Zr1–O22 | 1.9831(15) | C11–H11  | 0.9500   |
| Zr1–N21 | 2.2997(18) | C12–H12A | 0.9800   |
| Zr1–N1  | 2.317(2)   | C12–H12B | 0.9800   |
| C1–N1   | 1.287(3)   | C12–H12C | 0.9800   |
| C1–O1   | 1.325(3)   | C21–N21  | 1.285(3) |
| C1–C6   | 1.451(4)   | C21–O21  | 1.327(3) |
| C2–O1   | 1.419(3)   | C21–C26  | 1.445(4) |
| C2–C3   | 1.519(4)   | C22–O21  | 1.437(3) |
| C2–H2A  | 0.9900     | C22–C23  | 1.521(3) |
| C2–H2B  | 0.9900     | C22–H22A | 0.9900   |
| C3–N1   | 1.488(3)   | C22–H22B | 0.9900   |
| C3–C5   | 1.505(4)   | C23–N21  | 1.498(3) |
| C3–C4   | 1.506(4)   | C23–C25  | 1.509(3) |
| C4–H4A  | 0.9800     | C23–C24  | 1.510(4) |
| C4–H4B  | 0.9800     | C24–H24A | 0.9800   |
| C4–H4C  | 0.9800     | C24–H24B | 0.9800   |
| C5–H5A  | 0.9800     | C24–H24C | 0.9800   |
| C5–H5B  | 0.9800     | C25–H25A | 0.9800   |
| C5–H5C  | 0.9800     | C25–H25B | 0.9800   |
| C6–C7   | 1.386(3)   | C25–H25C | 0.9800   |
| C6–C11  | 1.395(3)   | C26–C27  | 1.387(3) |
| C7–O2   | 1.323(3)   | C26–C31  | 1.387(3) |
| C7–C8   | 1.398(4)   | C27–O22  | 1.328(3) |
| C8–C9   | 1.371(4)   | C27–C28  | 1.392(4) |
| C8–C12  | 1.484(4)   | C28–C29  | 1.366(4) |
| C9–C10  | 1.372(4)   | C28–C32  | 1.490(4) |

|             |           |            |          |
|-------------|-----------|------------|----------|
| C29-C30     | 1.377(4)  | C31-H31    | 0.9500   |
| C29-H29     | 0.9500    | C32-H32A   | 0.9800   |
| C30-C31     | 1.372(4)  | C32-H32B   | 0.9800   |
| C30-H30     | 0.9500    | C32-H32C   | 0.9800   |
| O2-Zr1-O22  | 162.08(7) | N1-C3-C4   | 110.5(2) |
| O2-Zr1-N21  | 89.73(7)  | C5-C3-C4   | 111.6(3) |
| O22-Zr1-N21 | 78.66(8)  | N1-C3-C2   | 102.4(2) |
| O2-Zr1-N1   | 77.88(7)  | C5-C3-C2   | 111.3(2) |
| O22-Zr1-N1  | 88.93(7)  | C4-C3-C2   | 110.4(2) |
| N21-Zr1-N1  | 92.54(7)  | C3-C4-H4A  | 109.5    |
| O2-Zr1-Cl1  | 98.26(5)  | C3-C4-H4B  | 109.5    |
| O22-Zr1-Cl1 | 94.69(5)  | H4A-C4-H4B | 109.5    |
| N21-Zr1-Cl1 | 86.69(5)  | C3-C4-H4C  | 109.5    |
| N1-Zr1-Cl1  | 176.07(6) | H4A-C4-H4C | 109.5    |
| O2-Zr1-Cl2  | 94.90(5)  | H4B-C4-H4C | 109.5    |
| O22-Zr1-Cl2 | 96.50(6)  | C3-C5-H5A  | 109.5    |
| N21-Zr1-Cl2 | 175.16(6) | C3-C5-H5B  | 109.5    |
| N1-Zr1-Cl2  | 87.07(5)  | H5A-C5-H5B | 109.5    |
| Cl1-Zr1-Cl2 | 94.02(3)  | C3-C5-H5C  | 109.5    |
| N1-C1-O1    | 116.6(2)  | H5A-C5-H5C | 109.5    |
| N1-C1-C6    | 129.4(2)  | H5B-C5-H5C | 109.5    |
| O1-C1-C6    | 114.0(2)  | C7-C6-C11  | 119.5(2) |
| O1-C2-C3    | 105.6(2)  | C7-C6-C1   | 121.1(2) |
| O1-C2-H2A   | 110.6     | C11-C6-C1  | 119.4(2) |
| C3-C2-H2A   | 110.6     | O2-C7-C6   | 119.6(2) |
| O1-C2-H2B   | 110.6     | O2-C7-C8   | 119.8(2) |
| C3-C2-H2B   | 110.6     | C6-C7-C8   | 120.6(2) |
| H2A-C2-H2B  | 108.7     | C9-C8-C7   | 118.0(2) |
| N1-C3-C5    | 110.2(2)  | C9-C8-C12  | 122.0(2) |

|               |            |               |            |
|---------------|------------|---------------|------------|
| C7-C8-C12     | 119.9(2)   | N21-C23-C24   | 112.5(2)   |
| C8-C9-C10     | 122.0(2)   | C25-C23-C24   | 111.3(2)   |
| C8-C9-H9      | 119.0      | N21-C23-C22   | 101.65(19) |
| C10-C9-H9     | 119.0      | C25-C23-C22   | 111.9(2)   |
| C11-C10-C9    | 120.2(2)   | C24-C23-C22   | 110.0(2)   |
| C11-C10-H10   | 119.9      | C23-C24-H24A  | 109.5      |
| C9-C10-H10    | 119.9      | C23-C24-H24B  | 109.5      |
| C10-C11-C6    | 119.7(2)   | H24A-C24-H24B | 109.5      |
| C10-C11-H11   | 120.1      | C23-C24-H24C  | 109.5      |
| C6-C11-H11    | 120.1      | H24A-C24-H24C | 109.5      |
| C8-C12-H12A   | 109.5      | H24B-C24-H24C | 109.5      |
| C8-C12-H12B   | 109.5      | C23-C25-H25A  | 109.5      |
| H12A-C12-H12B | 109.5      | C23-C25-H25B  | 109.5      |
| C8-C12-H12C   | 109.5      | H25A-C25-H25B | 109.5      |
| H12A-C12-H12C | 109.5      | C23-C25-H25C  | 109.5      |
| H12B-C12-H12C | 109.5      | H25A-C25-H25C | 109.5      |
| C1-N1-C3      | 107.6(2)   | H25B-C25-H25C | 109.5      |
| C1-N1-Zr1     | 124.92(16) | C27-C26-C31   | 119.8(2)   |
| C3-N1-Zr1     | 127.08(15) | C27-C26-C21   | 121.0(2)   |
| C1-O1-C2      | 107.80(19) | C31-C26-C21   | 119.2(2)   |
| C7-O2-Zr1     | 145.17(15) | O22-C27-C26   | 120.3(2)   |
| N21-C21-O21   | 116.5(2)   | O22-C27-C28   | 119.4(2)   |
| N21-C21-C26   | 129.1(2)   | C26-C27-C28   | 120.3(2)   |
| O21-C21-C26   | 114.4(2)   | C29-C28-C27   | 118.6(2)   |
| O21-C22-C23   | 105.00(19) | C29-C28-C32   | 121.8(2)   |
| O21-C22-H22A  | 110.7      | C27-C28-C32   | 119.6(2)   |
| C23-C22-H22A  | 110.7      | C28-C29-C30   | 121.6(2)   |
| O21-C22-H22B  | 110.7      | C28-C29-H29   | 119.2      |
| C23-C22-H22B  | 110.7      | C30-C29-H29   | 119.2      |
| H22A-C22-H22B | 108.8      | C31-C30-C29   | 119.9(2)   |
| N21-C23-C25   | 109.08(19) | C31-C30-H30   | 120.1      |

|               |            |
|---------------|------------|
| C29-C30-H30   | 120.1      |
| C30-C31-C26   | 119.7(2)   |
| C30-C31-H31   | 120.1      |
| C26-C31-H31   | 120.1      |
| C28-C32-H32A  | 109.5      |
| C28-C32-H32B  | 109.5      |
| H32A-C32-H32B | 109.5      |
| C28-C32-H32C  | 109.5      |
| H32A-C32-H32C | 109.5      |
| H32B-C32-H32C | 109.5      |
| C21-N21-C23   | 107.79(18) |
| C21-N21-Zr1   | 122.65(16) |
| C23-N21-Zr1   | 129.40(16) |
| C21-O21-C22   | 107.10(19) |
| C27-O22-Zr1   | 135.14(16) |

**Table 4.** Anisotropic displacement parameters [ $\text{\AA}^2 \times 10^3$ ]. The anisotropic displacementfactor exponent takes the form:  $-2\pi^2[h^2 a^{*2} U^{11} + \dots + 2 h k a^* b^* U^{12}]$ .

| Atom | $U^{11}$ | $U^{22}$ | $U^{33}$ | $U^{23}$ | $U^{13}$ | $U^{12}$ |
|------|----------|----------|----------|----------|----------|----------|
| C11  | 18(1)    | 34(1)    | 18(1)    | -4(1)    | 3(1)     | 1(1)     |
| C12  | 22(1)    | 35(1)    | 17(1)    | -5(1)    | -5(1)    | 7(1)     |
| Zr1  | 15(1)    | 15(1)    | 13(1)    | -1(1)    | 0(1)     | 1(1)     |
| C1   | 13(1)    | 24(1)    | 12(1)    | 1(1)     | 0(1)     | 3(1)     |
| C2   | 33(2)    | 23(2)    | 44(2)    | 9(1)     | 19(1)    | 0(1)     |
| C3   | 21(1)    | 17(1)    | 24(1)    | 5(1)     | 5(1)     | -4(1)    |
| C4   | 35(2)    | 33(2)    | 32(2)    | 20(1)    | 11(1)    | 10(1)    |
| C5   | 37(2)    | 48(2)    | 32(2)    | 6(1)     | -1(1)    | -22(2)   |
| C6   | 14(1)    | 19(1)    | 15(1)    | -3(1)    | -2(1)    | 1(1)     |
| C7   | 15(1)    | 18(1)    | 14(1)    | -1(1)    | -2(1)    | 1(1)     |
| C8   | 20(1)    | 19(1)    | 20(1)    | 2(1)     | -2(1)    | 2(1)     |
| C9   | 23(1)    | 17(1)    | 29(1)    | -3(1)    | -8(1)    | -2(1)    |
| C10  | 20(1)    | 23(2)    | 26(1)    | -9(1)    | -3(1)    | 6(1)     |
| C11  | 17(1)    | 23(1)    | 22(1)    | -2(1)    | 0(1)     | 3(1)     |
| C12  | 37(2)    | 24(2)    | 30(1)    | 0(1)     | 8(1)     | -8(1)    |
| N1   | 15(1)    | 17(1)    | 17(1)    | 2(1)     | 1(1)     | 0(1)     |
| O1   | 25(1)    | 21(1)    | 25(1)    | 1(1)     | 12(1)    | 0(1)     |
| O2   | 20(1)    | 14(1)    | 17(1)    | -3(1)    | 4(1)     | 0(1)     |
| C21  | 12(1)    | 22(1)    | 16(1)    | 2(1)     | 1(1)     | -1(1)    |
| C22  | 24(1)    | 19(1)    | 18(1)    | 3(1)     | -4(1)    | 2(1)     |
| C23  | 19(1)    | 19(1)    | 14(1)    | 1(1)     | -1(1)    | 2(1)     |
| C24  | 29(2)    | 20(1)    | 20(1)    | 4(1)     | -2(1)    | 1(1)     |
| C25  | 22(1)    | 27(2)    | 21(1)    | -1(1)    | -1(1)    | 8(1)     |
| C26  | 15(1)    | 18(1)    | 20(1)    | -2(1)    | 3(1)     | -2(1)    |
| C27  | 16(1)    | 18(1)    | 23(1)    | -2(1)    | 3(1)     | 0(1)     |
| C28  | 18(1)    | 18(1)    | 29(1)    | 2(1)     | 2(1)     | 0(1)     |
| C29  | 24(2)    | 13(1)    | 39(2)    | 1(1)     | 2(1)     | 1(1)     |

|     |       |       |       |       |       |       |
|-----|-------|-------|-------|-------|-------|-------|
| C30 | 27(2) | 18(2) | 32(1) | -9(1) | 2(1)  | 0(1)  |
| C31 | 19(1) | 23(1) | 20(1) | -3(1) | 2(1)  | -3(1) |
| C32 | 36(2) | 19(1) | 35(2) | 7(1)  | -7(1) | 1(1)  |
| N21 | 14(1) | 14(1) | 13(1) | 2(1)  | 0(1)  | 2(1)  |
| O21 | 20(1) | 20(1) | 18(1) | 0(1)  | -4(1) | 1(1)  |
| O22 | 28(1) | 15(1) | 17(1) | -1(1) | -2(1) | 3(1)  |

**Table 5.** Hydrogen coordinates [ $\times 10^4$ ] and isotropic displacement parameters [ $\text{\AA}^2 \times 10^3$ ].

| Atom | <i>x</i> | <i>y</i> | <i>z</i> | $U_{eq}$ | <i>S.o.f.</i> |
|------|----------|----------|----------|----------|---------------|
| H2A  | 4824     | 1758     | 4781     | 40       | 1             |
| H2B  | 5831     | 1637     | 5522     | 40       | 1             |
| H4A  | 2952     | 2432     | 5160     | 50       | 1             |
| H4B  | 3924     | 3252     | 5246     | 50       | 1             |
| H4C  | 2957     | 3124     | 6008     | 50       | 1             |
| H5A  | 4492     | 2920     | 7174     | 58       | 1             |
| H5B  | 5480     | 3086     | 6434     | 58       | 1             |
| H5C  | 5501     | 2139     | 7032     | 58       | 1             |
| H9   | 2383     | -2888    | 6742     | 27       | 1             |
| H10  | 3741     | -2617    | 5635     | 28       | 1             |
| H11  | 4443     | -1087    | 5378     | 25       | 1             |
| H12A | 1522     | -1347    | 8385     | 45       | 1             |
| H12B | 1250     | -2375    | 7966     | 45       | 1             |
| H12C | 551      | -1454    | 7624     | 45       | 1             |
| H22A | 3823     | 951      | 10492    | 25       | 1             |
| H22B | 5129     | 1092     | 10110    | 25       | 1             |
| H24A | 2389     | 100      | 9502     | 35       | 1             |
| H24B | 3531     | -508     | 9748     | 35       | 1             |
| H24C | 3072     | -476     | 8743     | 35       | 1             |
| H25A | 4684     | 255      | 7972     | 35       | 1             |
| H25B | 5434     | 20       | 8844     | 35       | 1             |
| H25C | 5433     | 1080     | 8442     | 35       | 1             |
| H29  | 1896     | 5738     | 8681     | 30       | 1             |
| H30  | 2638     | 5289     | 10052    | 31       | 1             |
| H31  | 3365     | 3752     | 10260    | 25       | 1             |
| H32A | 1165     | 5327     | 7243     | 45       | 1             |
| H32B | 1216     | 4236     | 6921     | 45       | 1             |
| H32C | 2329     | 4917     | 6787     | 45       | 1             |



**Table 1.** Crystal data and structure refinement for [L<sup>4</sup>ZrCl<sub>2</sub>].

|                                            |                                                                                  |                          |
|--------------------------------------------|----------------------------------------------------------------------------------|--------------------------|
| Identification code                        | <b>04src0532 (rb225)</b>                                                         |                          |
| Empirical formula                          | C <sub>30</sub> H <sub>40</sub> Cl <sub>2</sub> N <sub>2</sub> O <sub>4</sub> Zr |                          |
| Formula weight                             | 654.76                                                                           |                          |
| Temperature                                | 120(2) K                                                                         |                          |
| Wavelength                                 | 0.71073 Å                                                                        |                          |
| Crystal system                             | Monoclinic                                                                       |                          |
| Space group                                | C2/c                                                                             |                          |
| Unit cell dimensions                       | $a = 15.947(3) \text{ \AA}$                                                      | $\alpha = 90^\circ$      |
|                                            | $b = 8.3503(17) \text{ \AA}$                                                     | $\beta = 90.41(3)^\circ$ |
|                                            | $c = 22.819(5) \text{ \AA}$                                                      | $\gamma = 90^\circ$      |
| Volume                                     | 3038.6(11) Å <sup>3</sup>                                                        |                          |
| Z                                          | 4                                                                                |                          |
| Density (calculated)                       | 1.431 Mg / m <sup>3</sup>                                                        |                          |
| Absorption coefficient                     | 0.575 mm <sup>-1</sup>                                                           |                          |
| $F(000)$                                   | 1360                                                                             |                          |
| Crystal                                    | Plate; colourless                                                                |                          |
| Crystal size                               | 0.14 × 0.12 × 0.05 mm <sup>3</sup>                                               |                          |
| $\theta$ range for data collection         | 3.11 – 27.50°                                                                    |                          |
| Index ranges                               | -20 ≤ $h$ ≤ 20, -10 ≤ $k$ ≤ 10, -29 ≤ $l$ ≤ 29                                   |                          |
| Reflections collected                      | 15884                                                                            |                          |
| Independent reflections                    | 3478 [ $R_{int} = 0.0383$ ]                                                      |                          |
| Completeness to $\theta = 27.50^\circ$     | 99.5 %                                                                           |                          |
| Absorption correction                      | Semi-empirical from equivalents                                                  |                          |
| Max. and min. transmission                 | 0.9718 and 0.9239                                                                |                          |
| Refinement method                          | Full-matrix least-squares on $F^2$                                               |                          |
| Data / restraints / parameters             | 3478 / 0 / 183                                                                   |                          |
| Goodness-of-fit on $F^2$                   | 1.041                                                                            |                          |
| Final $R$ indices [ $F^2 > 2\sigma(F^2)$ ] | $RI = 0.0303$ , $wR2 = 0.0698$                                                   |                          |
| $R$ indices (all data)                     | $RI = 0.0400$ , $wR2 = 0.0739$                                                   |                          |

|                             |                                               |
|-----------------------------|-----------------------------------------------|
| Extinction coefficient      | 0.0016(2)                                     |
| Largest diff. peak and hole | 0.317 and $-0.434 \text{ e } \text{\AA}^{-3}$ |

---

**Diffractometer:** *Nonius KappaCCD* area detector ( $\phi$  scans and  $\omega$  scans to fill *asymmetric unit* sphere). **Cell determination:** DirAx (Duisenberg, A.J.M.(1992). *J. Appl. Cryst.* 25, 92-96.) **Data collection:** Collect (Collect: Data collection software, R. Hoof, Nonius B.V., 1998). **Data reduction and cell refinement:** *Denzo* (Z. Otwinowski & W. Minor, *Methods in Enzymology* (1997) Vol. 276: *Macromolecular Crystallography*, part A, pp. 307–326; C. W. Carter, Jr. & R. M. Sweet, Eds., Academic Press). **Absorption correction:** *SORTAV* (R. H. Blessing, *Acta Cryst.* A51 (1995) 33–37; R. H. Blessing, *J. Appl. Cryst.* 30 (1997) 421–426). **Structure solution:** *SHELXS97* (G. M. Sheldrick, *Acta Cryst.* (1990) A46 467–473). **Structure refinement:** *SHELXL97* (G. M. Sheldrick (1997), University of Göttingen, Germany). **Graphics:** Cameron - A Molecular Graphics Package. (D. M. Watkin, L. Pearce and C. K. Prout, Chemical Crystallography Laboratory, University of Oxford, 1993).

**Special details:**

**Table 2.** Atomic coordinates [ $\times 10^4$ ], equivalent isotropic displacement parameters [ $\text{\AA}^2 \times 10^3$ ] and site occupancy factors. $U_{eq}$  is defined as one third of the trace of the orthogonalized  $U^{ij}$  tensor.

| Atom | $x$     | $y$      | $z$     | $U_{eq}$ | $S.o.f.$ |
|------|---------|----------|---------|----------|----------|
| C1   | 5988(1) | 130(2)   | 6315(1) | 19(1)    | 1        |
| C2   | 6126(1) | 912(2)   | 5773(1) | 22(1)    | 1        |
| C3   | 5626(1) | 2404(2)  | 5591(1) | 24(1)    | 1        |
| C4   | 4676(1) | 2096(3)  | 5591(1) | 31(1)    | 1        |
| C5   | 5854(2) | 2940(3)  | 4968(1) | 37(1)    | 1        |
| C6   | 5843(1) | 3776(3)  | 6014(1) | 32(1)    | 1        |
| C7   | 6777(1) | 310(3)   | 5434(1) | 27(1)    | 1        |
| C8   | 7281(1) | -958(3)  | 5607(1) | 29(1)    | 1        |
| C9   | 7160(1) | -1677(3) | 6141(1) | 26(1)    | 1        |
| C10  | 6510(1) | -1124(2) | 6504(1) | 20(1)    | 1        |
| C11  | 3552(1) | -1779(2) | 7905(1) | 19(1)    | 1        |
| C12  | 3061(1) | -3366(2) | 7182(1) | 26(1)    | 1        |
| C13  | 3729(1) | -2229(2) | 6932(1) | 21(1)    | 1        |
| C14  | 4458(1) | -3168(2) | 6678(1) | 25(1)    | 1        |
| C15  | 3340(1) | -1101(3) | 6481(1) | 30(1)    | 1        |
| N1   | 3998(1) | -1281(2) | 7463(1) | 19(1)    | 1        |
| O1   | 5364(1) | 583(2)   | 6666(1) | 20(1)    | 1        |
| O2   | 3045(1) | -3022(2) | 7803(1) | 25(1)    | 1        |
| Cl1  | 3936(1) | 2676(1)  | 7230(1) | 29(1)    | 1        |
| Zr1  | 5000    | 733(1)   | 7500    | 16(1)    | 1        |

**Table 3.** Bond lengths [Å] and angles [°].

|           |            |                      |            |
|-----------|------------|----------------------|------------|
| C1–O1     | 1.337(2)   | C10–C11 <sup>i</sup> | 1.460(3)   |
| C1–C10    | 1.404(3)   | C11–N1               | 1.306(2)   |
| C1–C2     | 1.419(3)   | C11–O2               | 1.335(2)   |
| C2–C7     | 1.393(3)   | C11–C10 <sup>i</sup> | 1.460(3)   |
| C2–C3     | 1.534(3)   | C12–O2               | 1.448(2)   |
| C3–C4     | 1.536(3)   | C12–C13              | 1.539(3)   |
| C3–C6     | 1.536(3)   | C12–H12A             | 0.9900     |
| C3–C5     | 1.538(3)   | C12–H12B             | 0.9900     |
| C4–H4A    | 0.9800     | C13–N1               | 1.505(2)   |
| C4–H4B    | 0.9800     | C13–C14              | 1.520(3)   |
| C4–H4C    | 0.9800     | C13–C15              | 1.525(3)   |
| C5–H5A    | 0.9800     | C14–H14A             | 0.9800     |
| C5–H5B    | 0.9800     | C14–H14B             | 0.9800     |
| C5–H5C    | 0.9800     | C14–H14C             | 0.9800     |
| C6–H6A    | 0.9800     | C15–H15A             | 0.9800     |
| C6–H6B    | 0.9800     | C15–H15B             | 0.9800     |
| C6–H6C    | 0.9800     | C15–H15C             | 0.9800     |
| C7–C8     | 1.386(3)   | N1–Zr1               | 2.3217(16) |
| C7–H7     | 0.9500     | O1–Zr1               | 1.9965(13) |
| C8–C9     | 1.373(3)   | C11–Zr1              | 2.4239(6)  |
| C8–H8     | 0.9500     | Zr1–O1 <sup>i</sup>  | 1.9965(13) |
| C9–C10    | 1.409(3)   | Zr1–N1 <sup>i</sup>  | 2.3216(16) |
| C9–H9     | 0.9500     | Zr1–C11 <sup>i</sup> | 2.4239(6)  |
| O1–C1–C10 | 118.04(16) | C7–C2–C3             | 122.09(17) |
| O1–C1–C2  | 120.91(17) | C1–C2–C3             | 121.71(16) |
| C10–C1–C2 | 121.05(16) | C2–C3–C4             | 111.98(17) |
| C7–C2–C1  | 116.07(18) | C2–C3–C6             | 108.82(16) |

|            |            |                         |            |
|------------|------------|-------------------------|------------|
| C4-C3-C6   | 110.06(17) | C10-C9-H9               | 120.4      |
| C2-C3-C5   | 111.13(16) | C1-C10-C9               | 120.12(17) |
| C4-C3-C5   | 106.73(17) | C1-C10-C11 <sup>i</sup> | 121.28(16) |
| C6-C3-C5   | 108.02(18) | C9-C10-C11 <sup>i</sup> | 118.36(17) |
| C3-C4-H4A  | 109.5      | N1-C11-O2               | 116.42(16) |
| C3-C4-H4B  | 109.5      | N1-C11-C10 <sup>i</sup> | 129.46(17) |
| H4A-C4-H4B | 109.5      | O2-C11-C10 <sup>i</sup> | 114.04(15) |
| C3-C4-H4C  | 109.5      | O2-C12-C13              | 104.85(15) |
| H4A-C4-H4C | 109.5      | O2-C12-H12A             | 110.8      |
| H4B-C4-H4C | 109.5      | C13-C12-H12A            | 110.8      |
| C3-C5-H5A  | 109.5      | O2-C12-H12B             | 110.8      |
| C3-C5-H5B  | 109.5      | C13-C12-H12B            | 110.8      |
| H5A-C5-H5B | 109.5      | H12A-C12-H12B           | 108.9      |
| C3-C5-H5C  | 109.5      | N1-C13-C14              | 111.41(15) |
| H5A-C5-H5C | 109.5      | N1-C13-C15              | 109.29(15) |
| H5B-C5-H5C | 109.5      | C14-C13-C15             | 111.66(17) |
| C3-C6-H6A  | 109.5      | N1-C13-C12              | 102.77(14) |
| C3-C6-H6B  | 109.5      | C14-C13-C12             | 110.82(16) |
| H6A-C6-H6B | 109.5      | C15-C13-C12             | 110.55(17) |
| C3-C6-H6C  | 109.5      | C13-C14-H14A            | 109.5      |
| H6A-C6-H6C | 109.5      | C13-C14-H14B            | 109.5      |
| H6B-C6-H6C | 109.5      | H14A-C14-H14B           | 109.5      |
| C8-C7-C2   | 123.39(18) | C13-C14-H14C            | 109.5      |
| C8-C7-H7   | 118.3      | H14A-C14-H14C           | 109.5      |
| C2-C7-H7   | 118.3      | H14B-C14-H14C           | 109.5      |
| C9-C8-C7   | 120.18(18) | C13-C15-H15A            | 109.5      |
| C9-C8-H8   | 119.9      | C13-C15-H15B            | 109.5      |
| C7-C8-H8   | 119.9      | H15A-C15-H15B           | 109.5      |
| C8-C9-C10  | 119.12(19) | C13-C15-H15C            | 109.5      |
| C8-C9-H9   | 120.4      | H15A-C15-H15C           | 109.5      |

|                                       |            |
|---------------------------------------|------------|
| H15B-C15-H15C                         | 109.5      |
| C11-N1-C13                            | 107.51(15) |
| C11-N1-Zr1                            | 125.47(13) |
| C13-N1-Zr1                            | 127.01(11) |
| C1-O1-Zr1                             | 144.21(12) |
| C11-O2-C12                            | 108.07(14) |
| O1-Zr1-O1 <sup>i</sup>                | 172.81(7)  |
| O1-Zr1-N1                             | 97.13(6)   |
| O1 <sup>i</sup> -Zr1-N1               | 77.59(6)   |
| O1-Zr1-N1 <sup>i</sup>                | 77.59(5)   |
| O1 <sup>i</sup> -Zr1-N1 <sup>i</sup>  | 97.13(6)   |
| N1-Zr1-N1 <sup>i</sup>                | 87.15(8)   |
| O1-Zr1-Cl1 <sup>i</sup>               | 94.40(4)   |
| O1 <sup>i</sup> -Zr1-Cl1 <sup>i</sup> | 90.41(4)   |
| N1-Zr1-Cl1 <sup>i</sup>               | 167.11(4)  |
| N1 <sup>i</sup> -Zr1-Cl1 <sup>i</sup> | 89.72(4)   |
| O1-Zr1-Cl1                            | 90.41(4)   |
| O1 <sup>i</sup> -Zr1-Cl1              | 94.40(4)   |
| N1-Zr1-Cl1                            | 89.72(4)   |
| N1 <sup>i</sup> -Zr1-Cl1              | 167.11(4)  |
| Cl1 <sup>i</sup> -Zr1-Cl1             | 95.97(3)   |

---

Symmetry transformations used to generate equivalent atoms:

(i)  $-x+1, y, -z+3/2$

---

**Table 4.** Anisotropic displacement parameters [ $\text{\AA}^2 \times 10^3$ ]. The anisotropic displacement factor exponent takes the form:  $-2\pi^2[h^2 a^{*2} U^{11} + \dots + 2 h k a^* b^* U^{12}]$ .

| Atom | $U^{11}$ | $U^{22}$ | $U^{33}$ | $U^{23}$ | $U^{13}$ | $U^{12}$ |
|------|----------|----------|----------|----------|----------|----------|
| C1   | 14(1)    | 21(1)    | 21(1)    | -3(1)    | 0(1)     | -1(1)    |
| C2   | 18(1)    | 25(1)    | 22(1)    | -1(1)    | -1(1)    | -1(1)    |
| C3   | 22(1)    | 26(1)    | 24(1)    | 4(1)     | 2(1)     | 2(1)     |
| C4   | 23(1)    | 36(1)    | 33(1)    | 8(1)     | -3(1)    | 3(1)     |
| C5   | 41(1)    | 38(1)    | 31(1)    | 12(1)    | 8(1)     | 10(1)    |
| C6   | 30(1)    | 26(1)    | 39(1)    | 1(1)     | 2(1)     | 3(1)     |
| C7   | 24(1)    | 34(1)    | 23(1)    | 0(1)     | 4(1)     | 2(1)     |
| C8   | 24(1)    | 37(1)    | 27(1)    | -4(1)    | 7(1)     | 7(1)     |
| C9   | 20(1)    | 28(1)    | 29(1)    | -3(1)    | 1(1)     | 6(1)     |
| C10  | 16(1)    | 21(1)    | 24(1)    | -2(1)    | -1(1)    | 1(1)     |
| C11  | 13(1)    | 15(1)    | 29(1)    | 1(1)     | -2(1)    | 0(1)     |
| C12  | 24(1)    | 25(1)    | 29(1)    | -9(1)    | 5(1)     | -6(1)    |
| C13  | 18(1)    | 21(1)    | 25(1)    | -4(1)    | 1(1)     | -1(1)    |
| C14  | 20(1)    | 27(1)    | 28(1)    | -7(1)    | 3(1)     | -2(1)    |
| C15  | 28(1)    | 32(1)    | 30(1)    | -3(1)    | -7(1)    | 2(1)     |
| N1   | 14(1)    | 16(1)    | 25(1)    | -2(1)    | 1(1)     | 1(1)     |
| O1   | 16(1)    | 21(1)    | 23(1)    | 1(1)     | 3(1)     | 3(1)     |
| O2   | 22(1)    | 24(1)    | 29(1)    | -2(1)    | 2(1)     | -9(1)    |
| Cl1  | 20(1)    | 25(1)    | 41(1)    | 7(1)     | 5(1)     | 7(1)     |
| Zr1  | 12(1)    | 15(1)    | 21(1)    | 0        | 3(1)     | 0        |

---
